# Supplementary material for: Influences of melting method on fused iron catalysts for Fischer–Tropsch synthesis
Source: Royal Society of Chemistry journal article supplement (doi:10.1039/c6ra06772g), 2016-01-01
Supplement: c6ra06772g1.pdf [file c6ra06772g1.pdf]

Every data will be calibrated by mass balance, oxygen balance and carbon balance. These were recorded in primary sheet. Most of those balances are kept between 97.0%-103.0% except for a few eccentric data.

### primary data

Table S1

| preparation    |         | Argon arc welder |          |          |          |          |          |          |
|----------------|---------|------------------|----------|----------|----------|----------|----------|----------|
| date           |         | 13.10.12         | 13.10.13 | 13.10.14 | 13.10.15 | 13.10.16 | 13.10.17 | 13.10.18 |
| density        |         | 2.55             | 2.55     | 2.55     | 2.55     | 2.55     | 2.55     | 2.55     |
| size           | mesh    | 60-80            | 60-80    | 60-80    | 60-80    | 60-80    | 60-80    | 60-80    |
| charge         | ml      | 2                | 2        | 2        | 2        | 2        | 2        | 2        |
| TOS            | h       | 12               | 36       | 60       | 84       | 108      | 132      | 156      |
| Temperature    | °C      | 229.4            | 229.2    | 240      | 239.9    | 251      | 251.1    | 261.3    |
| P              | MPa     | 1.95             | 1.95     | 1.95     | 1.95     | 1.95     | 1.95     | 1.95     |
| GHSV           | h-1     | 3005.75          | 3005.75  | 3005.75  | 3005.75  | 3005.75  | 3005.75  | 3005.75  |
| H2/CO          |         | 2.41             | 2.41     | 2.41     | 2.41     | 2.41     | 2.41     | 2.47     |
| CO+H2 conv     | %       | 34.05            | 33.62    | 42.46    | 40.27    | 50.81    | 50.95    | 58.64    |
| CHn Prod       | mg/ml/h | 149.58           | 174.25   | 260.21   | 253.88   | 335.81   | 291.52   | 341.55   |
| H2O sel        | %       | 16.68            | 17.75    | 14.60    | 15.11    | 13.64    | 15.69    | 19.96    |
| CO2 sel        | %       | 57.31            | 54.26    | 55.58    | 53.40    | 54.35    | 54.29    | 48.89    |
| CH4            | wt%     | 8.07             | 7.00     | 7.32     | 7.18     | 8.71     | 9.15     | 10.25    |
| C5+            | wt%     | 56.48            | 60.94    | 59.02    | 60.38    | 58.16    | 56.25    | 53.28    |
| C5-11          | wt%     | 40.45            | 46.37    | 46.10    | 48.02    | 46.17    | 43.96    | 41.02    |
| C12-18         | wt%     | 13.54            | 12.31    | 10.91    | 10.43    | 8.85     | 9.08     | 9.06     |
| C19+           | wt%     | 2.49             | 2.27     | 2.01     | 1.93     | 3.13     | 3.21     | 3.20     |
| C2-4 O/P       |         | 2.42             | 2.47     | 2.52     | 2.47     | 2.40     | 2.39     | 2.35     |
| used H2/CO     |         | 1.00             | 1.06     | 0.93     | 0.87     | 1.00     | 1.00     | 1.13     |
| Mass balance   | %       | 95.52            | 98.68    | 101.55   | 98.11    | 104.37   | 98.20    | 100.84   |
| Carbon balance | %       | 99.61            | 96.38    | 100.86   | 97.90    | 103.70   | 97.44    | 99.46    |
| Oxygen balance | %       | 95.95            | 100.61   | 102.11   | 97.00    | 102.51   | 98.93    | 102.03   |

Table S2

| preparation | Oxyacetylene torch |          |          |          |          |          |          |          |
|-------------|--------------------|----------|----------|----------|----------|----------|----------|----------|
| date        | 13.10.12           | 13.10.13 | 13.10.14 | 13.10.15 | 13.10.16 | 13.10.17 | 13.10.18 | 13.10.19 |
| density     | 2.63               | 2.63     | 2.63     | 2.63     | 2.63     | 2.63     | 2.63     | 2.63     |
| size        | 60-80              | 60-80    | 60-80    | 60-80    | 60-80    | 60-80    | 60-80    | 60-80    |
| charge      | 2                  | 2        | 2        | 2        | 2        | 2        | 2        | 2        |
| TOS         | 12                 | 36       | 60       | 84       | 108      | 132      | 156      | 180      |
| T           | 236.3              | 236.3    | 250.5    | 250.4    | 259.9    | 259.8    | 270.6    | 270.5    |
| P           | 2.1                | 2.1      | 2.1      | 2.1      | 2.1      | 2.1      | 2.1      | 2.1      |
| GHSV        | 3004.92            | 3004.92  | 3004.92  | 3004.92  | 3004.92  | 3004.92  | 3004.92  | 3004.92  |
| H2/CO       | 2.41               | 2.41     | 2.41     | 2.41     | 2.41     | 2.41     | 2.47     | 2.47     |
| CO+H2 conv  | 35.23              | 35.40    | 49.33    | 47.48    | 57.40    | 53.81    | 60.95    | 61.45    |
| CHn Prod    | 172.37             | 199.21   | 276.74   | 264.16   | 311.77   | 301.87   | 350.73   | 341.30   |
| H2O sel     | 22.44              | 23.15    | 19.64    | 21.42    | 20.01    | 19.86    | 20.18    | 18.97    |
| CO2 sel     | 48.35              | 44.96    | 49.05    | 46.96    | 47.94    | 49.02    | 48.28    | 49.54    |
| CH4         | 11.24              | 9.84     | 12.01    | 12.24    | 13.96    | 13.64    | 15.67    | 15.79    |
| C5+         | 48.57              | 54.79    | 49.52    | 48.82    | 42.39    | 42.88    | 38.81    | 38.08    |
| C5-11       | 38.81              | 42.99    | 39.32    | 39.00    | 31.74    | 32.59    | 29.80    | 30.50    |
| C12-18      | 8.49               | 10.25    | 8.32     | 8.00     | 7.09     | 6.84     | 6.41     | 5.38     |
| C19+        | 1.28               | 1.54     | 1.88     | 1.81     | 3.56     | 3.44     | 2.60     | 2.19     |
| C2-4 O/P    | 1.63               | 1.63     | 1.20     | 1.20     | 1.00     | 1.04     | 0.90     | 0.92     |
| used H2/CO  | 1.23               | 1.27     | 1.11     | 1.07     | 1.20     | 1.12     | 1.26     | 1.30     |

|                |       |        |       |       |       |       |        |        |
|----------------|-------|--------|-------|-------|-------|-------|--------|--------|
| Mass balance   | 97.40 | 100.54 | 97.56 | 95.56 | 95.92 | 98.00 | 103.21 | 101.78 |
| Carbon balance | 95.96 | 100.11 | 96.78 | 95.84 | 95.33 | 96.50 | 103.52 | 102.93 |
| Oxygen balance | 99.49 | 101.40 | 97.67 | 95.52 | 96.00 | 98.87 | 103.91 | 102.47 |

Table S3

| preparation    | Induction furnace |         |         |         |         |         |         |         |
|----------------|-------------------|---------|---------|---------|---------|---------|---------|---------|
| date           | 13.6.5            | 13.6.6  | 13.6.7  | 13.6.8  | 13.6.9  | 13.6.10 | 13.6.13 | 13.6.14 |
| density        | 2.04              | 2.04    | 2.04    | 2.04    | 2.04    | 2.04    | 2.04    | 2.04    |
| size           | 60-80             | 60-80   | 60-80   | 60-80   | 60-80   | 60-80   | 60-80   | 60-80   |
| charge         | 2                 | 2       | 2       | 2       | 2       | 2       | 2       | 2       |
| TOS            | 72                | 96      | 120     | 144     | 168     | 192     | 216     | 240     |
| T              | 230.6             | 230.6   | 230.4   | 239.9   | 239.6   | 249.2   | 249.5   | 259.2   |
| P              | 2.05              | 2.05    | 2.05    | 2.05    | 2.05    | 2.05    | 2       | 2       |
| GHSV           | 2998.26           | 2998.26 | 2998.26 | 2998.26 | 2998.26 | 2998.26 | 2998.26 | 2998.26 |
| H2/CO          | 2.37              | 2.37    | 2.37    | 2.37    | 2.37    | 2.37    | 2.37    | 2.37    |
| CO+H2 conv     | 14.57             | 14.97   | 13.63   | 17.07   | 16.85   | 18.07   | 21.01   | 27.39   |
| CHn Prod       | 76.25             | 70.95   | 80.92   | 94.38   | 94.64   | 129.20  | 112.15  | 146.70  |
| H2O sel        | 41.57             | 44.43   | 39.93   | 39.54   | 44.27   | 38.41   | 38.08   | 36.24   |
| CO2 sel        | 18.61             | 15.02   | 14.03   | 16.30   | 12.52   | 17.16   | 20.75   | 23.41   |
| CH4            | 17.50             | 18.75   | 17.48   | 21.40   | 21.35   | 21.88   | 17.89   | 19.16   |
| C5+            | 29.34             | 25.79   | 32.90   | 24.40   | 22.93   | 21.40   | 24.94   | 23.78   |
| C5-11          | 29.06             | 25.62   | 32.56   | 24.22   | 22.79   | 21.33   | 24.77   | 21.42   |
| C12-18         | 0.24              | 0.15    | 0.30    | 0.15    | 0.12    | 0.06    | 0.15    | 0.44    |
| C19+           | 0.03              | 0.02    | 0.04    | 0.02    | 0.01    | 0.01    | 0.02    | 1.93    |
| C2-4 O/P       | 0.41              | 0.39    | 0.39    | 0.32    | 0.33    | 0.30    | 0.34    | 0.34    |
| used H2/CO     | 1.29              | 1.54    | 1.38    | 1.35    | 1.41    | 1.24    | 1.75    | 1.92    |
| Mass balance   | 96.20             | 96.03   | 96.85   | 95.37   | 96.46   | 98.96   | 98.00   | 99.32   |
| Carbon balance | 95.80             | 95.93   | 97.02   | 95.13   | 95.59   | 99.52   | 98.33   | 100.32  |
| Oxygen balance | 95.90             | 96.00   | 95.51   | 95.92   | 95.50   | 96.55   | 97.38   | 98.84   |

| preparation    | Induction furnace |         |         |         |         |         |         |         |
|----------------|-------------------|---------|---------|---------|---------|---------|---------|---------|
| date           | 13.6.15           | 13.6.16 | 13.6.17 | 13.6.18 | 13.6.19 | 13.6.20 | 13.6.21 | 13.6.22 |
| density        | 2.04              | 2.04    | 2.04    | 2.04    | 2.04    | 2.04    | 2.04    | 2.04    |
| size           | 60-80             | 60-80   | 60-80   | 60-80   | 60-80   | 60-80   | 60-80   | 60-80   |
| charge         | 2                 | 2       | 2       | 2       | 2       | 2       | 2       | 2       |
| TOS            | 264               | 288     | 312     | 336     | 360     | 384     | 408     | 432     |
| T              | 259.3             | 259.5   | 269.2   | 269     | 279.5   | 279.3   | 289.9   | 289.9   |
| P              | 2                 | 2       | 2       | 2       | 2       | 2       | 1.94    | 1.94    |
| GHSV           | 2998.26           | 2998.26 | 2998.26 | 2998.26 | 2998.26 | 2998.26 | 2998.26 | 2998.26 |
| H2/CO          | 2.37              | 2.37    | 2.37    | 2.37    | 2.37    | 2.37    | 2.37    | 2.34    |
| CO+H2 conv     | 23.96             | 26.06   | 30.52   | 29.38   | 33.77   | 31.72   | 38.12   | 38.49   |
| CHn Prod       | 143.51            | 137.96  | 179.23  | 166.55  | 205.58  | 208.33  | 237.54  | 232.09  |
| H2O sel        | 35.24             | 35.66   | 32.24   | 35.27   | 32.07   | 31.62   | 31.45   | 28.09   |
| CO2 sel        | 24.23             | 22.86   | 25.22   | 23.40   | 26.24   | 23.69   | 26.59   | 34.37   |
| CH4            | 19.74             | 20.31   | 19.95   | 21.69   | 23.75   | 24.67   | 27.06   | 27.61   |
| C5+            | 22.84             | 22.06   | 26.61   | 20.66   | 18.85   | 18.83   | 16.23   | 15.26   |
| C5-11          | 20.12             | 19.80   | 22.94   | 17.67   | 16.04   | 15.29   | 13.35   | 12.85   |
| C12-18         | 0.50              | 0.43    | 0.64    | 0.53    | 0.51    | 0.60    | 0.50    | 0.42    |
| C19+           | 2.23              | 1.84    | 3.03    | 2.46    | 2.30    | 2.93    | 2.38    | 1.99    |
| C2-4 O/P       | 0.37              | 0.39    | 0.39    | 0.43    | 0.46    | 0.50    | 0.53    | 0.54    |
| used H2/CO     | 1.76              | 1.89    | 1.74    | 1.73    | 1.61    | 1.55    | 1.59    | 1.64    |
| Mass balance   | 100.90            | 98.15   | 98.84   | 98.59   | 99.23   | 98.87   | 99.52   | 102.98  |
| Carbon balance | 102.01            | 99.55   | 101.70  | 99.96   | 101.77  | 102.74  | 102.61  | 103.10  |
| Oxygen balance | 100.03            | 97.28   | 96.55   | 97.21   | 96.63   | 97.72   | 96.20   | 101.83  |

| preparation    | Induction furnace |         |         |         |         |
|----------------|-------------------|---------|---------|---------|---------|
| date           | 13.6.23           | 13.6.24 | 13.6.25 | 13.6.27 | 13.6.28 |
| density        | 2.04              | 2.04    | 2.04    | 2.04    | 2.04    |
| size           | 60-80             | 60-80   | 60-80   | 60-80   | 60-80   |
| charge         | 2                 | 2       | 2       | 2       | 2       |
| TOS            | 456               | 480     | 504     | 552     | 576     |
| T              | 299.9             | 299.9   | 310.5   | 310.3   | 320.5   |
| P              | 1.94              | 1.94    | 1.94    | 1.94    | 1.94    |
| GHSV           | 2998.26           | 2998.26 | 2998.26 | 2998.26 | 2998.26 |
| H2/CO          | 2.34              | 2.34    | 2.34    | 2.34    | 2.34    |
| CO+H2 conv     | 43.29             | 42.04   | 48.86   | 49.79   | 59.36   |
| CHn Prod       | 247.63            | 250.38  | 276.61  | 296.24  | 334.64  |
| H2O sel        | 26.95             | 26.76   | 26.53   | 25.49   | 24.78   |
| CO2 sel        | 35.17             | 34.42   | 35.07   | 35.48   | 36.08   |
| CH4            | 30.22             | 30.89   | 32.14   | 32.02   | 30.87   |
| C5+            | 13.96             | 14.22   | 10.88   | 11.85   | 11.56   |
| C5-11          | 11.70             | 11.22   | 9.15    | 9.91    | 9.21    |
| C12-18         | 0.40              | 0.52    | 0.30    | 0.35    | 0.42    |
| C19+           | 1.86              | 2.48    | 1.43    | 1.59    | 1.93    |
| C2-4 O/P       | 0.55              | 0.56    | 0.59    | 0.64    | 0.68    |
| used H2/CO     | 1.69              | 1.71    | 1.72    | 1.60    | 1.61    |
| Mass balance   | 100.86            | 101.89  | 100.21  | 99.78   | 96.34   |
| Carbon balance | 103.58            | 104.31  | 103.90  | 103.99  | 101.44  |
| Oxygen balance | 99.37             | 99.86   | 98.13   | 96.50   | 96.28   |

The catalyst prepared by Argon arc welder method were evaluated twice for repeatable. See table S4-S5

repeat experiment

run 1

Table S4

| preparation |         | Argon arc welder |            |            |            |            |            |            |
|-------------|---------|------------------|------------|------------|------------|------------|------------|------------|
| date        |         | 2013.10.12       | 2013.10.13 | 2013.10.14 | 2013.10.15 | 2013.10.16 | 2013.10.17 | 2013.10.18 |
| density     |         | 2.55             | 2.55       | 2.55       | 2.55       | 2.55       | 2.55       | 2.55       |
| size        | mesh    | 60-80            | 60-80      | 60-80      | 60-80      | 60-80      | 60-80      | 60-80      |
| charge      | ml      | 2                | 2          | 2          | 2          | 2          | 2          | 2          |
| TOS         | h       | 12               | 36         | 60         | 84         | 108        | 132        | 156        |
| Temperature | °C      | 229.4            | 229.2      | 240        | 239.9      | 251        | 251.1      | 261.3      |
| P           | MPa     | 1.95             | 1.95       | 1.95       | 1.95       | 1.95       | 1.95       | 1.95       |
| GHSV        | h-1     | 3006             | 3006       | 3006       | 3006       | 3006       | 3006       | 3006       |
| H2/CO       |         | 2.41             | 2.41       | 2.41       | 2.41       | 2.41       | 2.41       | 2.47       |
| CO+H2 conv  | %       | 34.05            | 33.62      | 42.46      | 40.27      | 50.81      | 50.95      | 58.64      |
| CHn Prod    | mg/ml/h | 149.58           | 174.25     | 260.21     | 253.88     | 335.81     | 291.52     | 341.55     |
| H2O sel     | %       | 16.68            | 17.75      | 14.60      | 15.11      | 13.64      | 15.69      | 19.96      |
| CO2 sel     | %       | 57.31            | 54.26      | 55.58      | 53.40      | 54.35      | 54.29      | 48.89      |
| CH4         | wt%     | 8.07             | 7.00       | 7.32       | 7.18       | 8.71       | 9.15       | 10.25      |
| C5+         | wt%     | 56.48            | 60.94      | 59.02      | 60.38      | 58.16      | 56.25      | 53.28      |
| C5-11       | wt%     | 40.45            | 46.37      | 46.10      | 48.02      | 46.17      | 43.96      | 41.02      |
| C12-18      | wt%     | 13.54            | 12.31      | 10.91      | 10.43      | 8.85       | 9.08       | 9.06       |
| C19+        | wt%     | 2.49             | 2.27       | 2.01       | 1.93       | 3.13       | 3.21       | 3.20       |
| C2-4 O/P    |         | 2.42             | 2.47       | 2.52       | 2.47       | 2.40       | 2.39       | 2.35       |
| used H2/CO  |         | 1.00             | 1.06       | 0.93       | 0.87       | 1.00       | 1.00       | 1.13       |
| M bal       | %       | 95.52            | 98.68      | 101.55     | 98.11      | 104.37     | 98.20      | 100.84     |

|       |   |       |        |        |       |        |       |        |
|-------|---|-------|--------|--------|-------|--------|-------|--------|
| C bal | % | 93.61 | 96.38  | 100.86 | 97.90 | 104.70 | 97.44 | 99.46  |
| O bal | % | 95.95 | 100.61 | 102.11 | 97.00 | 102.51 | 98.93 | 102.03 |

run 2

Table S5

| preparation | Argon arc welder |           |           |           |           |           |           |           |
|-------------|------------------|-----------|-----------|-----------|-----------|-----------|-----------|-----------|
|             | 2014.3.23        | 2014.3.24 | 2014.3.26 | 2014.3.27 | 2014.3.28 | 2014.3.29 | 2014.3.30 | 2014.3.31 |
| density     | 2.41             | 2.41      | 2.41      | 2.41      | 2.41      | 2.41      | 2.41      | 2.41      |
| size        | 60-80            | 60-80     | 60-80     | 60-80     | 60-80     | 60-80     | 60-80     | 60-80     |
| charge      | 2                | 2         | 2         | 2         | 2         | 2         | 2         | 2         |
| TOS         | 12               | 36        | 84        | 108       | 132       | 156       | 180       | 204       |
| T           | 220.6            | 220.7     | 230.7     | 230.6     | 240.4     | 240.4     | 250.3     | 260       |
| P           | 2                | 2         | 2         | 2         | 2         | 2         | 2         | 2         |
| GHSV        | 2948             | 2948      | 2948      | 2948      | 2948      | 2948      | 2948      | 2948      |
| H2/CO       | 2.51             | 2.51      | 2.41      | 2.41      | 2.41      | 2.41      | 2.41      | 2.41      |
| CO+H2 conv  | 23.09            | 24.02     | 33.84     | 35.01     | 44.01     | 45.15     | 48.28     | 57.79     |
| CHn Prod    | 111.62           | 135.86    | 210.81    | 212.78    | 212.70    | 267.24    | 276.61    | 323.74    |
| H2O sel     | 17.53            | 17.17     | 16.95     | 17.58     | 18.60     | 14.87     | 15.89     | 16.79     |
| CO2 sel     | 46.38            | 45.11     | 51.26     | 49.87     | 57.30     | 56.34     | 53.73     | 52.60     |
| CH4         | 6.24             | 5.66      | 5.76      | 5.83      | 10.27     | 8.96      | 8.77      | 11.33     |
| C5+         | 61.75            | 63.66     | 65.51     | 66.18     | 50.72     | 57.22     | 58.10     | 50.68     |
| C5-11       | 48.16            | 48.84     | 44.27     | 43.07     | 35.36     | 37.18     | 38.02     | 33.70     |
| C12-18      | 7.85             | 8.58      | 12.22     | 13.28     | 8.83      | 11.49     | 11.52     | 9.76      |
| C19+        | 5.73             | 6.24      | 9.02      | 9.84      | 6.52      | 8.55      | 8.56      | 7.23      |
| C2-4 O/P    | 2.30             | 2.35      | 2.33      | 2.27      | 2.06      | 1.94      | 1.85      | 1.57      |
| used H2/CO  | 1.48             | 1.45      | 1.07      | 1.11      | 0.99      | 0.99      | 1.08      | 1.12      |
| M bal       | 95.77            | 98.07     | 102.45    | 100.85    | 102.25    | 104.31    | 101.16    | 100.20    |
| C bal       | 97.85            | 101.30    | 103.01    | 101.60    | 96.12     | 103.01    | 100.98    | 99.87     |
| O bal       | 94.82            | 96.44     | 102.46    | 100.53    | 103.93    | 105.07    | 101.93    | 101.02    |
